# Supplementary material for: DeviCNV: detection and visualization of exon-level copy number variants in targeted next-generation sequencing data
Source: PubMed Central journal article supplement (PMC6192323; doi:10.1186/s12859-018-2409-6), 2018-10-16
Supplement: 12859_2018_2409_MOESM1_ESM.pdf [file 12859_2018_2409_MOESM1_ESM.pdf]

## Supplementary information for the article

### **DeviCNV: Detection and Visualization of Exon-Level Copy Number Variants in Targeted Next-Generation Sequencing Data**

Yeeok Kang<sup>1,2</sup>, Seong-Hyeuk Nam<sup>1</sup>, Kyung Sun Park<sup>1</sup>, Yoonjung Kim<sup>3</sup>, Jong-Won Kim<sup>4</sup>, Eunjung Lee<sup>5</sup>, Jung Min Ko<sup>6</sup>, Kyung-A Lee<sup>3,\*</sup>, Inho Park<sup>1,\*</sup>

<sup>1</sup>SD Genomics Co., Ltd., 11F, Seoul Gangnam Post Office, 619 Gaepo-ro, Gangnam-gu, Seoul 06336, Republic of Korea; <sup>2</sup>Department of Bio and Brain Engineering, KAIST, 291 Daehak-ro, Yuseong-gu, Daejeon, Republic of Korea; <sup>3</sup>Department of Laboratory Medicine, Yonsei University College of Medicine, 211 Eonjuro, Gangnam-gu, Seoul 06273, Republic of Korea; <sup>4</sup>Department of Laboratory Medicine and Genetics, Samsung Medical Center, Sungkyunkwan University School of Medicine, Seoul, Republic of Korea; <sup>5</sup>Division of Genetics and Genomics, Boston Children's Hospital and Harvard Medical School, Boston, USA; <sup>6</sup>Department of Pediatrics, Seoul National University Children's Hospital, Seoul National University College of Medicine, Seoul, Republic of Korea

\*corresponding author

**Note S1. Performance comparison based on the mean target depth for a sample**

To identify the minimum mean target depth in samples for detecting real CNVs, we ran DeviCNV with down-sampled samples. We selected one sample in a batch and made 10 input sets by down-sampling it by using samtools [1]. Total 40 input sets were created by repeating this process for four samples. We ran DeviCNV using these 40 sets as inputs. We examined whether the known CNVs were found in these down-sampled samples for each input set, and the number of detected candidates was measured.

In NA06804, known CNVs were not found when the mean target depth dropped to below 100X. Similarly, mean target depth dropped to below 60X for NA22208 sample, so no known CNV was detected. In the case of NA01741, the known CNV was well-detected regardless of how low the mean target depth was for the sample. These samples assumed that they have good uniformity and strong CNV signal. Likewise, the lower the mean target depth, the more the number of CNV candidates that were selected. Lastly, in GM14603, which had low uniformity, the number of CNV candidates did not change according to its mean target depth. As a result, this sample showed too many CNV candidates. In the case of IMD\_PCR GM14603, similarly to IMD\_HYB samples, the read depth of each pool dropped below 100, so no known CNV was detected.

| Panel& Platform      | Sample  | Gene  | NM                                       | CNV             | CNV size (kb) | Down sampling ratio | mean target depth | Median read depth                           | Find? <sup>a</sup> | #CNV <sup>b</sup> |
|----------------------|---------|-------|------------------------------------------|-----------------|---------------|---------------------|-------------------|---------------------------------------------|--------------------|-------------------|
| IMD_HYB& DeviCNV_HYB | NA06804 | HPRT1 | NM_000194                                | EX2-3 DUP       | 2.01          | 1                   | 242X              | 262                                         | O                  | 39                |
|                      |         |       |                                          |                 |               | 0.9                 | 218X              | 235.7                                       | O                  | 27                |
|                      |         |       |                                          |                 |               | 0.8                 | 194X              | 209.9                                       | O                  | 19                |
|                      |         |       |                                          |                 |               | 0.7                 | 169X              | 183.4                                       | O                  | 20                |
|                      |         |       |                                          |                 |               | 0.6                 | 145X              | 157.1                                       | O                  | 23                |
|                      |         |       |                                          |                 |               | 0.5                 | 121X              | 130.9                                       | O                  | 47                |
|                      |         |       |                                          |                 |               | 0.4                 | 97X               | 104.7                                       | O                  | 156               |
|                      |         |       |                                          |                 |               | 0.3                 | 73X               | 78.3                                        | X                  | 146               |
|                      |         |       |                                          |                 |               | 0.2                 | 48X               | 52.1                                        | X                  | 12                |
|                      | NA22208 | PCCA  | NM_000282                                | EX13-20 DEL     | 146.38        | 1                   | 184X              | 199.6                                       | O                  | 3                 |
|                      |         |       |                                          |                 |               | 0.9                 | 166X              | 179.5                                       | O                  | 3                 |
|                      |         |       |                                          |                 |               | 0.8                 | 147X              | 159.4                                       | O                  | 2                 |
|                      |         |       |                                          |                 |               | 0.7                 | 129X              | 139.4                                       | O                  | 4                 |
|                      |         |       |                                          |                 |               | 0.6                 | 110X              | 119.4                                       | O                  | 20                |
|                      |         |       |                                          |                 |               | 0.5                 | 92X               | 99.2                                        | A                  | 41                |
|                      |         |       |                                          |                 |               | 0.4                 | 74X               | 79.4                                        | A                  | 73                |
|                      |         |       |                                          |                 |               | 0.3                 | 55X               | 59.4                                        | X                  | 28                |
|                      |         |       |                                          |                 |               | 0.2                 | 37X               | 39.4                                        | X                  | 1                 |
| IMD_PCR& DeviCNV_PCR | NA01741 | GALT  | NM_000155                                | Entire gene DEL | 4.01          | 1                   | 524X              | Pool 1: 408.0, Pool 2: 556.0, Pool 3: 271.0 | O                  | 12                |
|                      |         |       |                                          |                 |               | 0.9                 | 472X              | Pool 1: 365.0, Pool 2: 501.0, Pool 3: 243.0 | O                  | 12                |
|                      |         |       |                                          |                 |               | 0.8                 | 419X              | Pool 1: 324.0, Pool 2: 444.0, Pool 3: 216.0 | O                  | 14                |
|                      |         |       |                                          |                 |               | 0.7                 | 367X              | Pool 1: 285.0, Pool 2: 389.0, Pool 3: 189.0 | O                  | 22                |
|                      |         |       |                                          |                 |               | 0.6                 | 314X              | Pool 1: 244.0, Pool 2: 333.0, Pool 3: 162.0 | O                  | 30                |
|                      |         |       |                                          |                 |               | 0.5                 | 262X              | Pool 1: 203.0, Pool 2: 278.0, Pool 3: 135.0 | O                  | 34                |
|                      |         |       |                                          |                 |               | 0.4                 | 210X              | Pool 1: 162.5, Pool 2: 220.0, Pool 3: 108.0 | O                  | 49                |
|                      |         |       |                                          |                 |               | 0.3                 | 157X              | Pool 1: 122.0, Pool 2: 166.0, Pool 3: 80.0  | O                  | 23                |
|                      |         |       |                                          |                 |               | 0.2                 | 105X              | Pool 1: 81.5, Pool 2: 110.0, Pool 3: 53.0   | O                  | 3                 |
|                      | 0.1     | 52X   | Pool 1: 41.0, Pool 2: 55.0, Pool 3: 27.0 | O               | 1             |                     |                   |                                             |                    |                   |
|                      | GM14603 | GAA   | NM_000152                                | EX18 DEL        | 0.16          | 1                   | 197X              | Pool 1: 215.0, Pool 2: 141.0, Pool 3: 90.0  | O                  | 24                |
|                      |         |       |                                          |                 |               | 0.9                 | 177X              | Pool 1: 193.0, Pool 2: 126.0, Pool 3: 81.0  | O                  | 17                |

|  |  |  |  |  |  |     |      |                                            |   |    |
|--|--|--|--|--|--|-----|------|--------------------------------------------|---|----|
|  |  |  |  |  |  | 0.8 | 157X | Pool 1: 172.0, Pool 2: 112.0, Pool 3: 72.0 | O | 10 |
|  |  |  |  |  |  | 0.7 | 138X | Pool 1: 150.0, Pool 2: 98.0, Pool 3: 63.0  | X | 4  |
|  |  |  |  |  |  | 0.6 | 118X | Pool 1: 129.0, Pool 2: 84.0, Pool 3: 54.0  | X | 1  |
|  |  |  |  |  |  | 0.5 | 98X  | Pool 1: 108.0, Pool 2: 70.0, Pool 3: 45.0  | X | 0  |
|  |  |  |  |  |  | 0.4 | 79X  | Pool 1: 85.0, Pool 2: 56.0, Pool 3: 36.0   | X | 0  |
|  |  |  |  |  |  | 0.3 | 59X  | Pool 1: 64.0, Pool 2: 42.0, Pool 3: 28.0   | X | 0  |
|  |  |  |  |  |  | 0.2 | 39X  | Pool 1: 42.5, Pool 2: 28.0, Pool 3: 18.0   | X | 0  |
|  |  |  |  |  |  | 0.1 | 20X  | Pool 1: 21.0, Pool 2: 14.0, Pool 3: 9.0    | X | 3  |

CNV, copy number variation; IMD, inherited metabolism disorder; HYB, hybridization-based capture approach; PCR, polymerase chain reaction based capture approach; EX, exon; DEL, deletion; DUP, duplication.

<sup>a</sup>Indicates whether each method found a known CNV. "O" means all CNVs were found, "X" means they were not found at all, and "A" means they were found only in some exons; <sup>b</sup>indicates the number of CNV candidates that received the highest score of 5 found in the corresponding sample.

## Note S2. Performance evaluation of DeviCNV by qPCR

DeviCNV detects raw CNV candidates, and then assigns scores to CNV candidates via the scoring system: 5-score CNV candidates, 4-score CNV candidates, 3-score CNV candidates, 2-score CNV candidates, 1-score CNV candidates and 0-score CNV candidates.

To evaluate the performance of DeviCNV, we performed qPCR on the subset of CNV candidates with confidence score of 5 from the IMD\_HYB dataset. The subset was selected from 11 cell lines with the number of CNV candidates of score 5 less than 10, which resulted in a total of 40 CNV candidates (27 duplications and 13 deletions). We randomly selected 25 of the 497 CNV candidates with confidence score of 4 from the above 11 cell lines. We selected 25 CNV candidates in 10 samples.

The table below shows the information and confirmation results of selected CNV candidates.

| Score | Type | CN | Sample  | Chr | Start     | End       | CNV size (kb) | Gene            | NM        | Exons     | Confirmed by qPCR |
|-------|------|----|---------|-----|-----------|-----------|---------------|-----------------|-----------|-----------|-------------------|
| 5     | del  | -2 | GM14734 | 6   | 32006027  | 32008071  | 2.05          | <i>CYP21A2</i>  | NM_000500 | Exon1-7   | Known CNV         |
| 5     | del  | -1 | GM14734 | 6   | 32008112  | 32008981  | 0.87          | <i>CYP21A2</i>  | NM_000500 | Exon8-10  | Known CNV         |
| 5     | del  | -1 | GM17433 | 9   | 6595003   | 6595183   | 0.18          | <i>GLDC</i>     | NM_000170 | Exon9     | Failed            |
| 5     | dup  | 1  | GM17433 | 11  | 68552392  | 68552572  | 0.18          | <i>CPT1A</i>    | NM_001876 | Exon10    | Confirmed         |
| 5     | del  | -1 | GM17433 | 11  | 118179071 | 118179251 | 0.18          | <i>CD3E</i>     | NM_000733 | Exon4     | Confirmed         |
| 5     | dup  | 1  | GM17433 | 14  | 64879149  | 64879299  | 0.15          | <i>MTHFD1</i>   | NM_005956 | Exon4     | Failed            |
| 5     | del  | -1 | GM17433 | 14  | 94849098  | 94849278  | 0.18          | <i>SERPINA1</i> | NM_000295 | Exon2     | Failed            |
| 5     | dup  | 1  | GM17433 | 15  | 45654339  | 45654476  | 0.14          | <i>GATM</i>     | NM_001482 | Exon9     | Confirmed         |
| 5     | dup  | 1  | GM17433 | 19  | 17948790  | 17948912  | 0.12          | <i>JAK3</i>     | NM_000215 | Exon12    | Failed            |
| 5     | dup  | 1  | GM24007 | 1   | 198697518 | 198698375 | 0.86          | <i>PTPRC</i>    | NM_002838 | Exon16-17 | Confirmed         |
| 5     | dup  | 1  | GM24007 | 3   | 81548310  | 81548446  | 0.14          | <i>GBE1</i>     | NM_000158 | Exon15    | Failed            |
| 5     | dup  | 1  | GM24007 | 6   | 70410646  | 70410826  | 0.18          | <i>LMBRD1</i>   | NM_018368 | Exon12    | Confirmed         |
| 5     | dup  | 1  | GM24007 | 12  | 21007891  | 21008131  | 0.24          | <i>SLCO1B3</i>  | NM_019844 | Exon4     | Confirmed         |
| 5     | del  | -1 | GM24007 | 12  | 103260303 | 103260511 | 0.21          | <i>PAH</i>      | NM_000277 | Exon5     | Confirmed         |

|   |     |    |         |    |           |           |       |                 |              |           |                            |
|---|-----|----|---------|----|-----------|-----------|-------|-----------------|--------------|-----------|----------------------------|
| 5 | del | -1 | GM24007 | X  | 30322625  | 30327562  | 4.94  | <i>NROB1</i>    | NM_000475    | Exon1-2   | Partially confirmed (EX1)  |
| 5 | del | -1 | GM24007 | X  | 38211879  | 38280405  | 68.53 | <i>OTC</i>      | NM_000531    | Exon1-10  | Known CNV                  |
| 5 | del | -1 | NA00006 | 11 | 108002563 | 108002743 | 0.18  | <i>ACAT1</i>    | NM_000019    | Exon2     | Failed                     |
| 5 | dup | 1  | NA00852 | 2  | 211504649 | 211504853 | 0.21  | <i>CPS1</i>     | NM_001875    | Exon24    | Failed                     |
| 5 | dup | 1  | NA00852 | 6  | 32006027  | 32006628  | 0.60  | <i>CYP21A2</i>  | NM_000500    | Exon1-2   | Failed                     |
| 5 | dup | 1  | NA00852 | 6  | 32008232  | 32008832  | 0.60  | <i>CYP21A2</i>  | NM_000500    | Exon8-10  | Failed                     |
| 5 | del | -1 | NA00852 | 16 | 223233    | 223771    | 0.54  | <i>HBA2</i>     | NM_000517    | Exon2-3   | Confirmed                  |
| 5 | dup | 1  | NA01741 | 1  | 120295929 | 120296072 | 0.14  | <i>HMGCS2</i>   | NM_005518    | Exon7     | Failed                     |
| 5 | dup | 1  | NA01741 | 8  | 133879175 | 133880409 | 1.24  | <i>TG</i>       | NM_003235    | Exon1-2   | Failed                     |
| 5 | dup | 1  | NA01741 | 8  | 133925221 | 133925401 | 0.18  | <i>TG</i>       | NM_003235    | Exon20    | Confirmed                  |
| 5 | dup | 1  | NA01741 | 8  | 133931550 | 133931730 | 0.18  | <i>TG</i>       | NM_003235    | Exon21    | Confirmed                  |
| 5 | del | -2 | NA01741 | 9  | 34646504  | 34650535  | 4.03  | <i>GALT</i>     | NM_000155    | Exon1-11  | Known CNV                  |
| 5 | dup | 1  | NA01741 | 15 | 45389861  | 45390009  | 0.15  | <i>DUOX2</i>    | NM_014080    | Exon28    | Failed                     |
| 5 | dup | 1  | NA02227 | 2  | 211456544 | 211456784 | 0.24  | <i>CPS1</i>     | NM_001875    | Exon10    | Failed                     |
| 5 | dup | 1  | NA02227 | 6  | 32008772  | 32008981  | 0.21  | <i>CYP21A2</i>  | NM_000500    | Exon10    | Confirmed                  |
| 5 | dup | 1  | NA02227 | 10 | 56076960  | 56077200  | 0.24  | <i>PCDH15</i>   | NM_033056    | Exon8     | Failed                     |
| 5 | del | -1 | NA02659 | 2  | 211521178 | 211521358 | 0.18  | <i>CPS1</i>     | NM_001875    | Exon30    | Failed                     |
| 5 | del | -1 | NA02659 | 16 | 223400    | 223771    | 0.37  | <i>HBA2</i>     | NM_000517    | Exon3     | Confirmed                  |
| 5 | dup | 1  | NA11781 | 1  | 155207974 | 155208154 | 0.18  | <i>GBA</i>      | NM_001005741 | Exon7     | Failed                     |
| 5 | dup | 1  | NA12217 | 1  | 155204715 | 155205521 | 0.81  | <i>GBA</i>      | NM_001005741 | Exon10-12 | Confirmed                  |
| 5 | dup | 1  | NA22496 | 7  | 65429359  | 65429539  | 0.18  | <i>GUSB</i>     | NM_000181    | Exon11    | Confirmed                  |
| 5 | dup | 1  | NA22496 | 8  | 134128842 | 134129022 | 0.18  | <i>TG</i>       | NM_003235    | Exon45    | Failed                     |
| 5 | dup | 1  | NA22496 | 14 | 94847137  | 94847317  | 0.18  | <i>SERPINA1</i> | NM_000295    | Exon3     | Failed                     |
| 5 | dup | 1  | NA22496 | 17 | 41055977  | 41056117  | 0.14  | <i>G6PC</i>     | NM_000151    | Exon2     | Confirmed                  |
| 5 | dup | 1  | NA22496 | X  | 18947275  | 18947515  | 0.24  | <i>PHKA2</i>    | NM_000292    | Exon13    | Failed                     |
| 5 | dup | 1  | NA22496 | X  | 48652429  | 48652669  | 0.24  | <i>GATA1</i>    | NM_002049    | Exon6     | Failed                     |
| 4 | del | -1 | GM17433 | 5  | 78076405  | 78076569  | 0.17  | <i>ARSB</i>     | NM_000046    | Exon8     | Failed                     |
| 4 | dup | 1  | GM17433 | 22 | 31019004  | 31019140  | 0.14  | <i>TCN2</i>     | NM_000355    | Exon8     | Confirmed                  |
| 4 | dup | 1  | GM23221 | 8  | 133947930 | 133948170 | 0.24  | <i>TG</i>       | NM_003235    | Exon25    | Failed                     |
| 4 | del | -1 | GM23221 | X  | 71822990  | 71823138  | 0.15  | <i>PHKA1</i>    | NM_002637    | Exon26    | Confirmed                  |
| 4 | dup | 1  | GM24007 | 6  | 70411710  | 70411915  | 0.21  | <i>LMBRD1</i>   | NM_018368    | Exon10    | Failed                     |
| 4 | dup | 1  | GM24007 | 7  | 117251782 | 117251924 | 0.14  | <i>CFTR</i>     | NM_000492    | Exon20    | Failed                     |
| 4 | del | -1 | NA00006 | 12 | 110011081 | 110011381 | 0.30  | <i>MMAB</i>     | NM_052845    | Exon1     | Failed                     |
| 4 | del | -1 | NA00852 | 16 | 222841    | 223771    | 0.93  | <i>HBA2</i>     | NM_000517    | Exon1-3   | Confirmed                  |
| 4 | dup | 1  | NA00852 | X  | 71904277  | 71904517  | 0.24  | <i>PHKA1</i>    | NM_002637    | Exon5     | Failed                     |
| 4 | del | -1 | NA01741 | 1  | 198608328 | 198608568 | 0.24  | <i>PTPRC</i>    | NM_002838    | Exon2     | Failed                     |
| 4 | dup | 1  | NA01741 | 8  | 134145763 | 134146003 | 0.24  | <i>TG</i>       | NM_003235    | Exon47    | Failed                     |
| 4 | dup | 1  | NA01741 | 11 | 76919768  | 76922452  | 2.69  | <i>MYO7A</i>    | NM_000260    | Exon44-45 | Partially confirmed (EX44) |
| 4 | dup | 1  | NA01741 | X  | 48652429  | 48652669  | 0.24  | <i>GATA1</i>    | NM_002049    | Exon6     | Failed                     |
| 4 | dup | 1  | NA02227 | 2  | 211440999 | 211441299 | 0.30  | <i>CPS1</i>     | NM_001875    | Exon3     | Confirmed                  |
| 4 | dup | 1  | NA02227 | 3  | 182788716 | 182789215 | 0.50  | <i>MCCCI</i>    | NM_020166    | Exon6-7   | Failed                     |
| 4 | dup | 1  | NA02227 | 5  | 41739421  | 41739661  | 0.24  | <i>OXCT1</i>    | NM_000436    | Exon16    | Failed                     |
| 4 | del | -1 | NA02227 | X  | 18969151  | 18969451  | 0.30  | <i>PHKA2</i>    | NM_000292    | Exon4     | Failed                     |
| 4 | dup | 1  | NA02227 | X  | 77258559  | 77258799  | 0.24  | <i>ATP7A</i>    | NM_000052    | Exon6     | Confirmed                  |
| 4 | del | -1 | NA02659 | 14 | 94847197  | 94847518  | 0.32  | <i>SERPINA1</i> | NM_000295    | Exon3     | Failed                     |

|   |     |    |         |    |           |           |      |                |           |           |           |
|---|-----|----|---------|----|-----------|-----------|------|----------------|-----------|-----------|-----------|
| 4 | del | -1 | NA11781 | 1  | 119957972 | 119962270 | 4.30 | <i>HSD3B2</i>  | NM_000198 | Exon2-3   | Failed    |
| 4 | del | -1 | NA11781 | 1  | 119964541 | 119965321 | 0.78 | <i>HSD3B2</i>  | NM_000198 | Exon4     | Confirmed |
| 4 | dup | 1  | NA11781 | 6  | 32008292  | 32008532  | 0.24 | <i>CYP21A2</i> | NM_000500 | Exon8-9   | Confirmed |
| 4 | dup | 1  | NA11781 | 11 | 76858893  | 76859073  | 0.18 | <i>MYO7A</i>   | NM_000260 | Exon4     | Failed    |
| 4 | dup | 1  | NA11781 | 19 | 41919883  | 41920123  | 0.24 | <i>BCKDHA</i>  | NM_000709 | Exon4     | Confirmed |
| 4 | dup | 1  | NA22496 | X  | 18944680  | 18947515  | 2.84 | <i>PHKA2</i>   | NM_000292 | Exon13-14 | Failed    |

CN, copy number; Chr, chromosome; CNV, copy number variation; DEL, deletion; DUP, duplication.

### Note S3. Performance comparison to VisCap, XHMM, and CODEX

According to qPCR confirmation, total 16 CNVs with confidence score of 5 detected from DeviCNV were confirmed (See Note S2). We evaluated how many of these CNVs could be detected with other tools: VisCap, XHMM, and CODEX.

The table below shows the information and detection results of the qPCR CNVs.

| Type | Sample  | Chr | Start     | End       | CNV size (kb) | Gene           | NM           | Exon      | DeviCNV | VisCap | XHMM | CODEX |
|------|---------|-----|-----------|-----------|---------------|----------------|--------------|-----------|---------|--------|------|-------|
| DUP  | GM17433 | 11  | 68552283  | 68552478  | 0.20          | <i>CPT1A</i>   | NM_001876    | Exon10    | O       | X      | X    | X     |
| DEL  | GM17433 | 11  | 118179142 | 118179156 | 0.01          | <i>CD3E</i>    | NM_000733    | Exon04    | O       | X      | X    | O     |
| DUP  | GM17433 | 15  | 45653322  | 45654419  | 1.10          | <i>GATM</i>    | NM_001482    | Exon09    | O       | X      | X    | X     |
| DUP  | GM24007 | 1   | 198697469 | 198698300 | 0.83          | <i>PTPRC</i>   | NM_002838    | Exon16-17 | O       | X      | X    | O     |
| DUP  | GM24007 | 6   | 70410657  | 70410761  | 0.10          | <i>LMBRD1</i>  | NM_018368    | Exon12    | O       | X      | X    | X     |
| DUP  | GM24007 | 12  | 21007962  | 21008103  | 0.14          | <i>SLCO1B3</i> | NM_019844    | Exon04    | O       | X      | X    | O     |
| DEL  | GM24007 | 12  | 103260374 | 103260441 | 0.07          | <i>PAH</i>     | NM_000277    | Exon05    | O       | O      | X    | X     |
| DEL  | GM24007 | X   | 30326313  | 30327495  | 1.18          | <i>NROB1</i>   | NM_000475    | Exon01    | O       | O      | X    | O     |
| DEL  | NA00852 | 16  | 223124    | 223709    | 0.59          | <i>HBA2</i>    | NM_000517    | Exon02-03 | O       | X      | O    | X     |
| DUP  | NA01741 | 8   | 133925292 | 133925510 | 0.22          | <i>TG</i>      | NM_003235    | Exon20    | O       | X      | X    | X     |
| DUP  | NA01741 | 8   | 133931621 | 133931770 | 0.15          | <i>TG</i>      | NM_003235    | Exon21    | O       | X      | X    | X     |
| DUP  | NA02227 | 6   | 32008646  | 32009447  | 0.80          | <i>CYP21A2</i> | NM_000500    | Exon10    | O       | X      | X    | X     |
| DEL  | NA02659 | 16  | 223471    | 223709    | 0.24          | <i>HBA2</i>    | NM_000517    | Exon03    | O       | X      | O    | X     |
| DUP  | NA12217 | 1   | 155204239 | 155205102 | 0.86          | <i>GBA</i>     | NM_001005741 | Exon12-11 | O       | X      | X    | X     |
| DUP  | NA22496 | 7   | 65429310  | 65429445  | 0.14          | <i>GUSB</i>    | NM_000181    | Exon11    | O       | X      | X    | X     |
| DUP  | NA22496 | 17  | 41055948  | 41056057  | 0.11          | <i>G6PC</i>    | NM_000151    | Exon02    | O       | X      | X    | O     |

Chr, chromosome; CNV, copy number variation; DEL, deletion; DUP, duplication.

<sup>a</sup>Indicates whether each method found a known CNV. "O" means CNVs were found, and "X" means they were not found at all.

### Note S4. Sample collection description of for the inherited metabolic disorder panel

#### Inclusion criteria

- (1) Patients who have been commissioned by primary/secondary hospitals or Seoul National University Children's Hospital newborn room to department of Pediatrics in SNU Children's Hospital for additional confirmation after abnormal findings in Inherited metabolic screening, which is performed on all newborns in Korea.

- (2) Patients currently in treatment, diagnosed from secondary blood/urine metabolism testing without identified genetic cause, after abnormal findings in initial IMD screening in Korea.

#### Exclusion criteria

- (1) Low birth weight less than 2.0 kg  
 (2) Premature infants less than 35 weeks

### Note S5. Visual inspection process to find pathogenic CNVs in patients

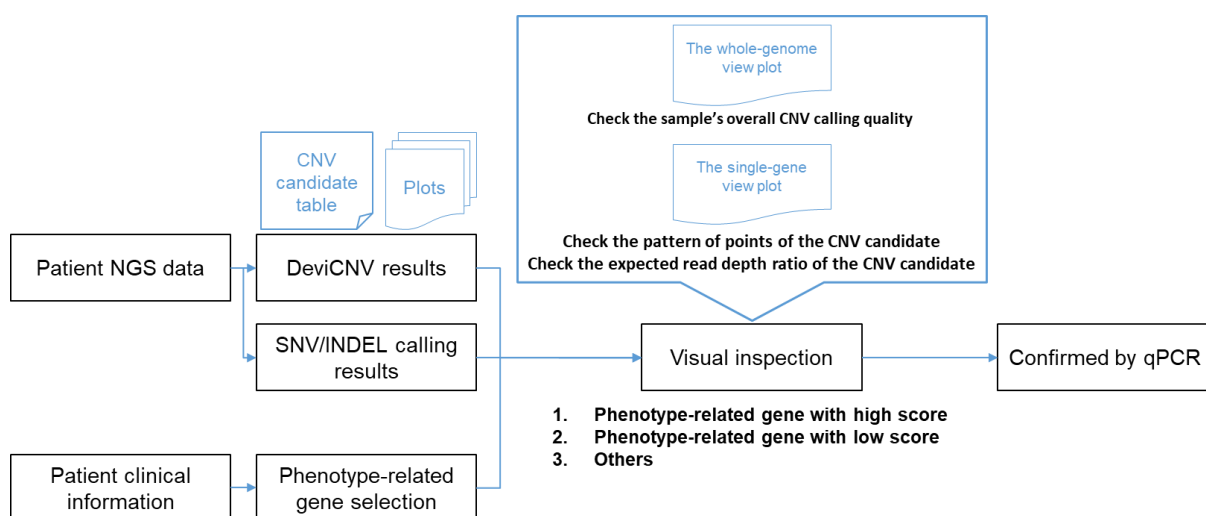

DeviCNV was used to find pathogenic CNVs in patients with inherited metabolic disorders through the IMD panel.

First, a CNV candidate list table and plots (one whole-genome view plot and single-gene view plots) were generated by DeviCNV, and SNV/INDEL analysis results were also obtained using SNV/INDEL caller with patient NGS data. We also selected genes related to patient phenotype by analyzing clinical information of patients. By combining these three sets of information, our clinician selected pathogenic CNV through visual inspection. The order of inspecting CNV candidates was as follows: (1) within phenotype-related gene and with high score, (2) within phenotype-related gene and with low score, and (3) others. To perform the visual inspection, the clinician first looked at the overall CNV calling quality through the whole-genome view plot of the sample. The clinician checked that the mean target depth of the sample was not too low, how many data points were classified as low-quality type, and that there were not too many duplications or deletions. Next, the clinician

looked at the gene-centric view plot with the CNV candidate. The clinician identified patterns of data points belonging to the CNV candidate, and confirmed that the expected read depth ratio was sufficiently low or increased.

Through this process, the clinician selected pathogenic CNV candidates and confirmed them by qPCR.

### Note S6. Performance comparison based on the number of input samples

To find the minimum number of input samples to run DeviCNV, nine experiments were performed with input sample sets that consist of five to 13 samples. For all experiments, all parameters were default setting. Failure rates of all experiments were 0%.

When five input samples were input to DeviCNV, no linear regression model was created for all probes, and no results were generated. Therefore, at least six samples are required. In addition, we checked whether or not each experimental setup detected eight known cell-line CNVs, and how many CNV candidates with confidence score of 5 were detected for each sample.

| Sample  |           |                   | CNV            |           |                            |               | The number of input samples |                                 |        |        |        |        |        |        |        |
|---------|-----------|-------------------|----------------|-----------|----------------------------|---------------|-----------------------------|---------------------------------|--------|--------|--------|--------|--------|--------|--------|
| Panel   | Cell line | Median read depth | Gene           | NM        | CNV                        | CNV size (kb) | 5                           | 6                               | 7      | 8      | 9      | 10     | 11     | 12     | 13     |
| IMD_HYB | GM14603   | 81.99             | <i>GAA</i>     | NM_000152 | EX18 DEL                   | 0.16          | NA                          | X <sup>a</sup> (0) <sup>b</sup> | X (0)  | X (0)  | X (5)  | X (2)  | X (1)  | X (1)  | X (3)  |
|         | GM14734   | 249.4             | <i>CYP21A2</i> | NM_000500 | 30 KB DEL, Entire gene DEL | 3.35          | NA                          | O (1)                           | X (0)  | O (3)  | O (4)  | O (3)  | O (2)  | O (3)  | O (4)  |
|         | GM24007   | 142.84            | <i>OTC</i>     | NM_000531 | Entire gene DEL            | 68.97         | NA                          | X (0)                           | O (1)  | O (3)  | O (4)  | O (6)  | O (9)  | O (10) | O (9)  |
|         | NA01741   | 164.4             | <i>GALT</i>    | NM_000155 | Entire gene DEL            | 4.01          | NA                          | X (3)                           | O (1)  | O (6)  | O (9)  | O (7)  | O (11) | O (14) | O (14) |
|         | NA06804   | 261.98            | <i>HPRT1</i>   | NM_000194 | EX2-3 DUP                  | 2.01          | NA                          | X (7)                           | O (24) | O (21) | O (23) | O (33) | O (34) | O (46) | O (40) |
|         | NA06805   | 80.13             | <i>GALC</i>    | NM_000153 | EX11-17 DEL                | 17.73         | -                           | X (1)                           | X (1)  | X (1)  | O (16) | O (11) | O (7)  | O (5)  | O (5)  |
|         | NA12217   | 269.08            | <i>CYP21A2</i> | NM_000500 | 30 KB DEL                  | 1.14          | -                           | -                               | X (0)  | X (1)  | X (1)  | X (2)  | X (4)  | X (3)  | O (7)  |
|         | NA22208   | 199.64            | <i>PCCA</i>    | NM_000282 | EX13-20 DEL                | 146.38        | -                           | -                               | -      | O (3)  | O (6)  | O (9)  | O (7)  | O (9)  | O (14) |

CNV, copy number variation; IMD, inherited metabolism disorder; HYB, hybridization based capture approach; EX, exon; DEL, deletion; DUP, duplication; NA, not available.

<sup>a</sup>Indicates whether each method found a known CNV. "O" means all CNVs were found, and "X" means they were not found at all; <sup>b</sup>indicates the number of CNV candidates that received the highest score of 5 found in the corresponding sample.

**Note S7. Performance comparison based on the configuration of the sample set used as an input**

We recommend that the input should consist of a sample set from the same batch. We compared CNV detection performance when using an input set obtained by mixing samples from different batches with when using an input set with samples from the same batch.

We used three batch sets of data from the IMD\_HYB: original\_batch1, original\_batch2 and original\_batch3. We randomly mixed 66 samples to construct three random batch sets: random\_batch1, random\_batch2 and random\_batch3. We also combined all the samples into a single set without regard to their batch: “merged all” batch.

Each set was analyzed using DeviCNV\_HYB. Of 66 samples, seven samples in the original batch, 10 samples in the random batch and 10 samples in the combined batch were filtered out, due to a low correlation coefficient. For comparisons under the same conditions, the mean and median of the raw and highest confidence CNV candidates were measured, except for the samples that were filtered out in any of the three experiments.

The following table shows statistical values for raw CNV candidates before scoring.

| #raw CNV | Original batch |      |       | Random batch |      |       | “Merged all” batch |      |       |
|----------|----------------|------|-------|--------------|------|-------|--------------------|------|-------|
|          | DUP            | DEL  | TOTAL | DUP          | DEL  | TOTAL | DUP                | DEL  | TOTAL |
| Average  | 48.7           | 23.1 | 71.8  | 103.5        | 50.3 | 153.8 | 116.9              | 53.6 | 170.5 |
| Median   | 13             | 6    | 22    | 48           | 31   | 88    | 48.5               | 42.5 | 98.5  |

Average, an average of raw CNV candidates of 56 samples; Median, a median of raw CNV candidates of 56 samples; DEL, deletion; DUP, duplication; TOTAL, the total number of deletions and duplications.

The following table shows statistical values for CNV candidates with confidence score of 5, which is the highest score from the scoring system of DeviCNV.

| #CNV    | Original batch |     |       | Random batch |     |       | “Merged all” batch |     |       |
|---------|----------------|-----|-------|--------------|-----|-------|--------------------|-----|-------|
|         | DUP            | DEL | TOTAL | DUP          | DEL | TOTAL | DUP                | DEL | TOTAL |
| Average | 5.8            | 2.3 | 8.1   | 16.9         | 5.8 | 22.7  | 21.9               | 8.3 | 30.2  |
| Median  | 1              | 0   | 2     | 5            | 2   | 9.5   | 8.5                | 2   | 13.5  |

Average, an average of 5-score CNV candidates of 56 samples; Median, a median of 5-score CNV candidates of 56 samples; DEL, deletion; DUP, duplication; TOTAL, the total number of deletions and duplications.

In experiments using the original batch, a small number of CNVs was detected. In contrast, the largest number of CNVs was detected from experiments using the random batch and “merged all” batch.





cell-line sample are shown in the following table. Usually the larger the median read depth of the sample is, the fewer candidates are detected.

| Sample  |           |                   | Known CNV      |           |                            |               | Original Batch     |                   | Random Batch |      | "Merged all" Batch |      |
|---------|-----------|-------------------|----------------|-----------|----------------------------|---------------|--------------------|-------------------|--------------|------|--------------------|------|
| Panel   | Cell line | Median read depth | Gene           | NM        | CNV                        | CNV size (kb) | Find? <sup>a</sup> | #CNV <sup>b</sup> | Find?        | #CNV | Find?              | #CNV |
| IMD_HYB | GM14603   | 81.99             | <i>GAA</i>     | NM_000152 | EX18 DEL                   | 0.16          | O                  | 24                | X            | 4    | X                  | 8    |
|         | GM14734   | 249.4             | <i>CYP21A2</i> | NM_000500 | 30 KB DEL, Entire gene DEL | 3.35          | O                  | 2                 | O            | 29   | O                  | 37   |
|         | GM24007   | 142.84            | <i>OTC</i>     | NM_000531 | Entire gene DEL            | 68.97         | O                  | 7                 | O            | 10   | O                  | 12   |
|         | NA01741   | 164.4             | <i>GALT</i>    | NM_000155 | Entire gene DEL            | 4.01          | O                  | 6                 | O            | 20   | O                  | 28   |
|         | NA06804   | 261.98            | <i>HPRT1</i>   | NM_000194 | EX2-3 DUP                  | 2.01          | O                  | 34                | O            | 56   | O                  | 63   |
|         | NA06805   | 80.13             | <i>GALC</i>    | NM_000153 | EX11-17 DEL                | 17.73         | O                  | 44                | O            | 11   | O                  | 16   |
|         | NA12217   | 269.08            | <i>CYP21A2</i> | NM_000500 | 30 KB DEL                  | 1.14          | X                  | 1                 | O            | 9    | O                  | 15   |
|         | NA22208   | 199.64            | <i>PCCA</i>    | NM_000282 | EX13-20 DEL                | 146.38        | O                  | 3                 | O            | 5    | O                  | 12   |

CNV, copy number variant; EX, exon; DEL, deletion; DUP, duplication.

<sup>a</sup>Indicates whether each method found a known CNV. "O" means all CNVs were found, and "X" means they were not found at all; <sup>b</sup>indicates the number of CNV candidates that received the highest score of 5 found in the corresponding sample.

### Note S8. Differences in the number of data points for each exon based on input intervals

Usually, one more probes tiled in one exon for targeted NGS panel design. When we analyze NGS data, we considered which unit is better to detect CNV signal: individual probes or individual exons (or merged probes).

DeviCNV does not merge overlapping probe (or amplicon) intervals, which would cause reduction in probe-specific information; instead, it analyzes probes separately. Therefore, a probe-level read depth is estimated and a probe-level read depth ratio is predicted, and DeviCNV can obtain one more signals for one exon.

In contrast, if a merged probe interval is used for a single exon or a target interval (usually an exon interval) for one exon, usually only one signal can be collected for each exon. In the case of fewer data points per exon, it is not likely to detect single exon CNVs; and even if some CNVs are detected, they would be less reliable.

To confirm differences of detecting performances between using individual probes and merged probes (=target intervals), we ran DeviCNV to analyze IMD\_HYB and IMD\_PCR samples with probes and targets(exon) as interval inputs.

In the experiment with probes as the interval input, we used default parameter setting for scoring system. In the experiment with targets as the interval input, we extracted duplication/deletion regions covered by one or more consecutive probe-level significant duplications/deletions at the step of adding duplication or deletion region covered by consecutive strong probe-level CNV signals, and changed the threshold of “ProbeCntInRegion” filter to one or more and removed the threshold of “STDOfReadDepthRatios” filter to detect single-level exon CNVs.

| Abbreviation             | Description                                                                          | Calculation method                                                                                                                                                                            | Parameter setting for probe input interval                                             | Parameter setting for target input interval                                            |
|--------------------------|--------------------------------------------------------------------------------------|-----------------------------------------------------------------------------------------------------------------------------------------------------------------------------------------------|----------------------------------------------------------------------------------------|----------------------------------------------------------------------------------------|
| ProbeCntInRegion         | How many signals support the CNV candidate?                                          | Counting read depth ratio signals for a CNV candidate                                                                                                                                         | 1 point for $\geq 2$                                                                   | 1 point for $\geq 1$                                                                   |
| AverageOfReadDepthRatios | How strong is the signal supporting the CNV candidate?                               | Calculating an average log <sub>2</sub> -transformed median predicted probe-level read depth ratio values for a CNV candidate                                                                 | If deletion, 1 point for $< \log_2(0.6)$ ; If duplication, 1 point for $> \log_2(1.4)$ | If deletion, 1 point for $< \log_2(0.6)$ ; If duplication, 1 point for $> \log_2(1.4)$ |
| STDOfReadDepthRatios     | How stable are the signals supporting the CNV candidate?                             | Calculating a standard deviation for the log <sub>2</sub> -transformed median predicted probe-level read depth ratio values for a CNV candidate                                               | 1 point for $< 0.4$                                                                    | -                                                                                      |
| AverageOfCIs             | How small are the confidence intervals for the signals supporting the CNV candidate? | Calculating average log <sub>2</sub> -transformed 95% confidence interval lengths for predicted probe-level read-depth ratios for a CNV candidate                                             | 1 point for $< 0.4$                                                                    | 1 point for $< 0.4$                                                                    |
| AverageOfR2vals          | How reliable is the model that generated the signals that support the CNV candidate? | Calculating average mean R-squared values per probe for a CNV candidate, with the average R-squared value per probe referring to an average of the R-squared values of N models for one probe | 1 point for $\geq 0.85$                                                                | 1 point for $\geq 0.85$                                                                |

CNV, copy number variant; CI, confidence interval.

With total 14 cell-line known CNVs, we compared the performances of two experiments. In the PCR-based method using multiple pools, it was more useful to use amplicon information rather than target information as it detects fewer CNV candidates. This is thought to be due to low information loss. For the hybridization-based method, if probe information could not be obtained, the target information was used as the input interval. However, the probe interval input method with less information loss showed better performance when looking for small size CNVs (*GAA EX18 DEL*).

| Sample  |           |                   | CNV            |           |                            |               | Probe interval input |                   | Target interval input |      |
|---------|-----------|-------------------|----------------|-----------|----------------------------|---------------|----------------------|-------------------|-----------------------|------|
| Panel   | Cell line | Median read depth | Gene           | NM        | CNV                        | CNV size (kb) | Find? <sup>a</sup>   | #CNV <sup>b</sup> | Find?                 | #CNV |
| IMD_HYB | GM14603   | 81.99             | <i>GAA</i>     | NM_000152 | EX18 DEL                   | 0.16          | O                    | 24                | X                     | 5    |
|         | GM14734   | 249.4             | <i>CYP21A2</i> | NM_000500 | 30 KB DEL, Entire gene DEL | 3.35          | O                    | 2                 | O                     | 1    |

|         |         |                                                   |                |           |                               |        |   |    |   |     |
|---------|---------|---------------------------------------------------|----------------|-----------|-------------------------------|--------|---|----|---|-----|
|         | GM24007 | 142.84                                            | <i>OTC</i>     | NM_000531 | Entire gene DEL               | 68.97  | O | 7  | O | 7   |
|         | NA01741 | 164.4                                             | <i>GALT</i>    | NM_000155 | Entire gene DEL               | 4.01   | O | 6  | O | 4   |
|         | NA06804 | 261.98                                            | <i>HPRT1</i>   | NM_000194 | EX2-3 DUP                     | 2.01   | O | 34 | O | 15  |
|         | NA06805 | 80.13                                             | <i>GALC</i>    | NM_000153 | EX11-17 DEL                   | 17.73  | O | 44 | X | 12  |
|         | NA12217 | 269.08                                            | <i>CYP21A2</i> | NM_000500 | 30 KB DEL                     | 1.14   | X | 1  | O | 3   |
|         | NA22208 | 199.64                                            | <i>PCCA</i>    | NM_000282 | EX13-20 DEL                   | 146.38 | O | 3  | O | 2   |
| IMD_PCR | NA01741 | Pool 1: 408.0,<br>Pool 2: 556.0,<br>Pool 3: 271.0 | <i>GALT</i>    | NM_000155 | Entire gene DEL               | 4.01   | O | 10 | O | 5   |
|         | NA12217 | Pool 1: 192.0,<br>Pool 2: 117.0,<br>Pool 3: 99.0  | <i>CYP21A2</i> | NM_000500 | 30 KB DEL                     | 1.14   | X | 37 | X | 14  |
|         | GM14603 | Pool 1: 215.0,<br>Pool 2: 141.0,<br>Pool 3: 90.0  | <i>GAA</i>     | NM_000152 | EX18 DEL                      | 0.16   | O | 25 | O | 35  |
|         | NA14734 | Pool 1: 359.0,<br>Pool 2: 275.0,<br>Pool 3: 335.0 | <i>CYP21A2</i> | NM_000500 | 30 KB DEL,<br>Entire gene DEL | 3.35   | O | 9  | O | 123 |
|         | NA22208 | Pool 1: 235.0,<br>Pool 2: 99.0,<br>Pool 3: 158.0  | <i>PCCA</i>    | NM_000282 | EX13-20 DEL                   | 146.38 | O | 27 | O | 148 |
|         | GM24007 | Pool 1: 37.0,<br>Pool 2: 20.0,<br>Pool 3: 16.0    | <i>OTC</i>     | NM_000531 | Entire gene DEL               | 68.97  | X | 1  | X | 0   |

CNV, copy number variation; IMD, inherited metabolism disorder; HYB, hybridization based capture approach; PCR, polymerase chain reaction based capture approach; EX, exon; DEL, deletion; DUP, duplication.

<sup>a</sup>Indicates whether each method found a known CNV. "O" means all CNVs were found, and "X" means they were not found at all; <sup>b</sup>indicates the number of CNV candidates found in the corresponding sample. The number of 5-score CNV candidates that received the highest score for the probe interval input method and the number of 4-score CNV candidates that received the highest score for the target interval input method is indicated.

### Note S9. Performance comparison based on MQV thresholds

DeviCNV uses only reads that exceed the user-input mapping quality value (MQV) threshold. We compared cell-line CNV deletion results from DeviCNV using the following MQV thresholds:  $MQV \geq 0$  and  $MQV \geq 20$ .

The statistics of raw CNV candidates, before scoring with CNV candidates by the score system, are shown in the following table. Overall, " $MQV \geq 20$ " experiment using only reliable reads shows fewer raw CNV candidates.

| Panel   | #raw CNV | DeviCNV ( $MQV \geq 0$ )  |      |      |       | DeviCNV ( $MQV \geq 20$ ) |      |      |       |
|---------|----------|---------------------------|------|------|-------|---------------------------|------|------|-------|
|         |          | Failure rate <sup>a</sup> | DUP  | DEL  | TOTAL | Failure rate              | DUP  | DEL  | TOTAL |
| IMD_HYB | Average  | 11% (7/66)                | 59.3 | 25.9 | 85.2  | 9% (9/66)                 | 55.2 | 25.1 | 80.3  |
|         | Median   |                           | 14   | 5    | 25    |                           | 14   | 8    | 23    |
| IMD_PCR | Average  | 3% (1/34)                 | 47.9 | 71.3 | 119.2 | 3% (1/34)                 | 48   | 70.7 | 118.7 |

|  |        |  |    |    |    |  |    |    |    |
|--|--------|--|----|----|----|--|----|----|----|
|  | Median |  | 35 | 28 | 76 |  | 33 | 31 | 68 |
|--|--------|--|----|----|----|--|----|----|----|

Average, an average of raw CNV candidates of all samples except low-quality samples; Median, a median of all CNV candidates of all samples except low-quality samples; DEL, deletion; DUP, duplication; TOTAL, the total number of deletions and duplications.

<sup>a</sup>Indicates how many input samples fail in the low-quality sample filtering step.

The following table shows statistics for CNV candidates with confidence score of 5, which is the highest score from scoring system of DeviCNV.

| Panel   | #CNV    | DeviCNV (MQV $\geq$ 0)    |      |     |       | DeviCNV (MQV $\geq$ 20) |      |     |       |
|---------|---------|---------------------------|------|-----|-------|-------------------------|------|-----|-------|
|         |         | Failure rate <sup>a</sup> | DUP  | DEL | TOTAL | Failure rate            | DUP  | DEL | TOTAL |
| IMD_HYB | Average | 11% (7/66)                | 7.7  | 2.4 | 10.1  | 9% (9/66)               | 7.5  | 2.5 | 10.0  |
|         | Median  |                           | 1    | 0   | 2     |                         | 2    | 1   | 3     |
| IMD_PCR | Average | 3% (1/34)                 | 14.4 | 8.2 | 22.6  | 3% (1/34)               | 14.1 | 7.9 | 22    |
|         | Median  |                           | 6    | 4   | 10    |                         | 6    | 3   | 11    |

Average, an average of CNV candidates with the highest score of 5 of all samples except low-quality samples; Median, a median of CNV candidates with the highest score of 5 of all samples except low-quality samples; DEL, deletion; DUP, duplication; TOTAL, the total number of deletions and duplications.

<sup>a</sup>Indicates how many input samples fail in the low-quality sample filtering step.

Comparison of the two experiments revealed that the number of the highest confidence CNV candidates and the performance of the known cell-line CNV detection were similar. The MQV threshold may affect the read depth calculation in authentic gene regions for genes with corresponding pseudogenes, since the reads in these regions had low MQV values.

In case of *GAA* single-exon deletion of GM14603 of IMD\_HYB, the coverage of the corresponding sample was not good. Therefore, we confirmed that this CNV was only detected in MQV0 experiment, using as many reads as possible.

For the 1-copy deletion of *CYP21A2* of NA12217 samples of IMD\_HYB/IMD\_PCR, it was too difficult to detect due to the effect of pseudogene. We confirmed that the CNV was detected in the IMD\_HYB MQV $\geq$ 20 experiment using only reliable reads.

For the 1-copy deletion of *OTC* of GM24007 sample of IMD\_PCR, the quality of this sample was bad for CNV calling, due to low coverage and filter-out from low-quality sample filter. Therefore, *OTC* deletion was not detected in all experiments.

| Sample  |           |                   | CNV        |           |          |               | DeviCNV (MQV $\geq$ 0) |                   | DeviCNV (MQV $\geq$ 20) |      |
|---------|-----------|-------------------|------------|-----------|----------|---------------|------------------------|-------------------|-------------------------|------|
| Panel   | Cell line | Median read depth | Gene       | NM        | CNV      | CNV size (kb) | Find? <sup>a</sup>     | #CNV <sup>b</sup> | Find?                   | #CNV |
| IMD_HYB | GM14603   | 81.99             | <i>GAA</i> | NM_000152 | EX18 DEL | 0.16          | O                      | 24                | X                       | 5    |

|         |         |                                                   |                |           |                               |        |   |    |   |    |
|---------|---------|---------------------------------------------------|----------------|-----------|-------------------------------|--------|---|----|---|----|
|         | GM14734 | 249.4                                             | <i>CYP21A2</i> | NM_000500 | 30 KB DEL,<br>Entire gene DEL | 3.35   | O | 2  | O | 3  |
|         | GM24007 | 142.84                                            | <i>OTC</i>     | NM_000531 | Entire gene DEL               | 68.97  | O | 7  | O | 11 |
|         | NA01741 | 164.4                                             | <i>GALT</i>    | NM_000155 | Entire gene DEL               | 4.01   | O | 6  | O | 6  |
|         | NA06804 | 261.98                                            | <i>HPRT1</i>   | NM_000194 | EX2-3 DUP                     | 2.01   | O | 34 | O | 30 |
|         | NA06805 | 80.13                                             | <i>GALC</i>    | NM_000153 | EX11-17 DEL                   | 17.73  | O | 44 | O | 22 |
|         | NA12217 | 269.08                                            | <i>CYP21A2</i> | NM_000500 | 30 KB DEL                     | 1.14   | X | 1  | O | 2  |
|         | NA22208 | 199.64                                            | <i>PCCA</i>    | NM_000282 | EX13-20 DEL                   | 146.38 | O | 3  | O | 6  |
| IMD_PCR | NA01741 | Pool 1: 408.0,<br>Pool 2: 556.0,<br>Pool 3: 271.0 | <i>GALT</i>    | NM_000155 | Entire gene DEL               | 4.01   | O | 10 | O | 11 |
|         | NA12217 | Pool 1: 192.0,<br>Pool 2: 117.0,<br>Pool 3: 99.0  | <i>CYP21A2</i> | NM_000500 | 30 KB DEL                     | 1.14   | X | 37 | X | 35 |
|         | GM14603 | Pool 1: 215.0,<br>Pool 2: 141.0,<br>Pool 3: 90.0  | <i>GAA</i>     | NM_000152 | EX18 DEL                      | 0.16   | O | 25 | O | 23 |
|         | NA14734 | Pool 1: 359.0,<br>Pool 2: 275.0,<br>Pool 3: 335.0 | <i>CYP21A2</i> | NM_000500 | 30 KB DEL,<br>Entire gene DEL | 3.35   | O | 9  | O | 9  |
|         | NA22208 | Pool 1: 235.0,<br>Pool 2: 99.0,<br>Pool 3: 158.0  | <i>PCCA</i>    | NM_000282 | EX13-20 DEL                   | 146.38 | O | 27 | O | 31 |
|         | GM24007 | Pool 1: 37.0,<br>Pool 2: 20.0,<br>Pool 3: 16.0    | <i>OTC</i>     | NM_000531 | Entire gene DEL               | 68.97  | X | 1  | X | 2  |

CNV, copy number variation; IMD, inherited metabolism disorder; HYB, hybridization based capture approach; PCR, polymerase chain reaction based capture approach; MQV, mapping quality value; EX, exon; DEL, deletion; DUP, duplication.

<sup>a</sup>Indicates whether each method found a known CNV. "O" means all CNVs were found, and "X" means they were not found at all; <sup>b</sup>indicates the number of CNV candidates that received the highest score of 5 found in the corresponding sample.

### Note S10. Low-quality sample filter by using sample-to-sample correlation

To filter out low-quality samples, we assumed that if the number of segments resulting from running a CBS (circular binary segmentation) of a sample is too many than other samples, the sample is considered as low-quality, which has high probability to detect abnormally large CNVs. Since large amount of CNV candidates from these low-quality samples are unreliable, they should be excluded when creating a linear regression model.

DeviCNV finds CNV candidates by comparing the read depth ratios of the samples in the same batch. Therefore, for samples with low sample-to-sample correlation values, the number of CNVs candidates must be high. Therefore, these samples must be filtered out in the generating model step.

To determine the criteria for the low-quality sample filter, we analyzed the histogram of CBS segments from the all samples of IMD\_HYB and IMD\_PCR. To count CBS segments

for each sample, only the number of segments with read depth ratio values of more than 1.3 or less than 0.7 (possibly a candidate for duplication/deletion) was selected.

Histogram plot of the number of segments of IMD\_HYB samples

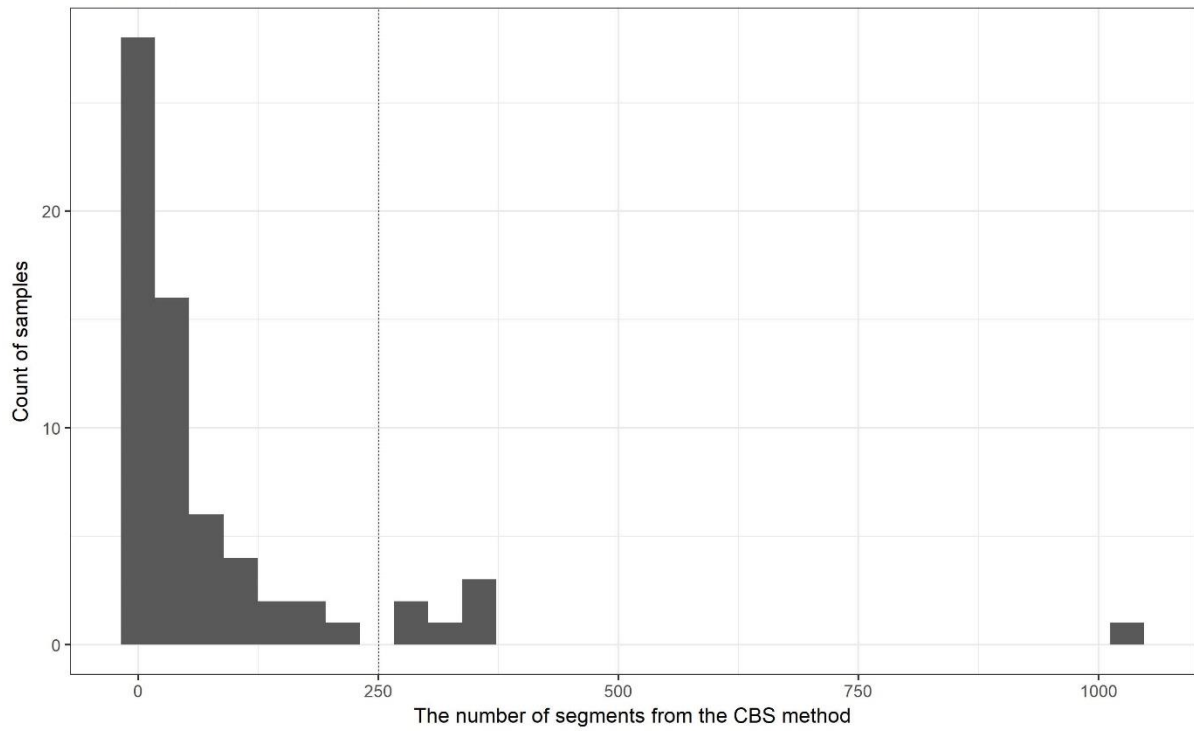

Histogram plot of the number of segments of IMD\_PCR samples

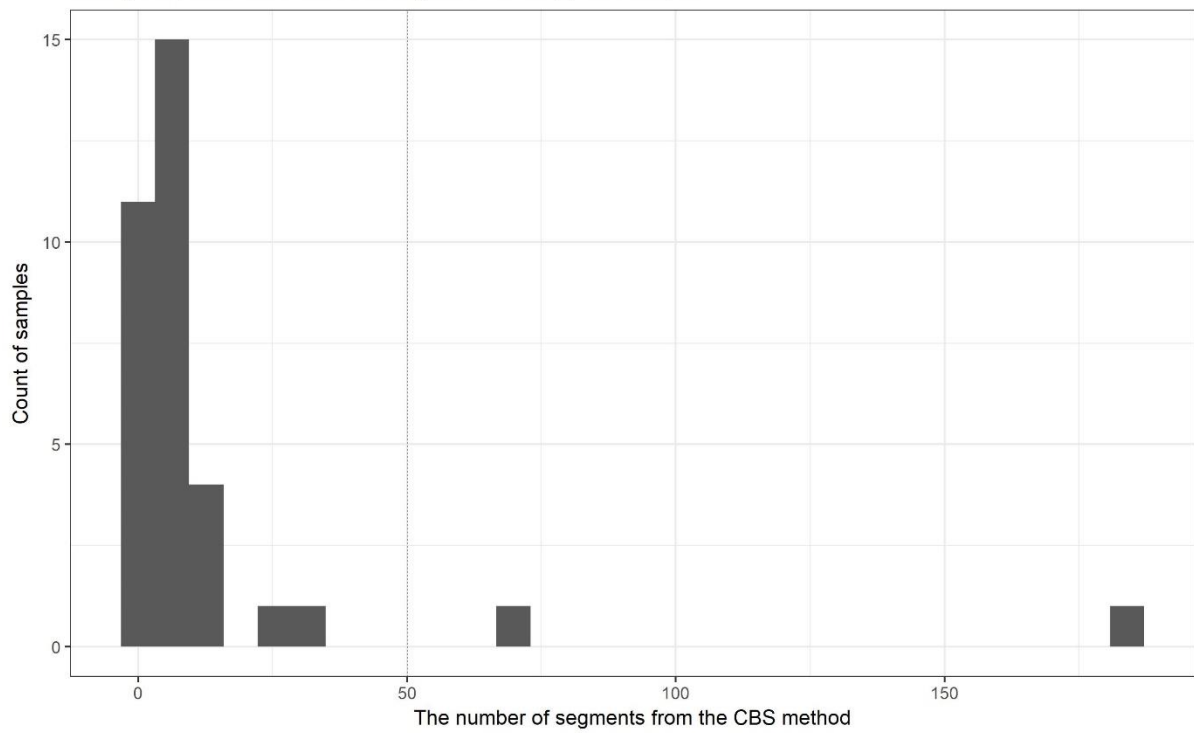

Samples with 250 or more segments in IMD\_HYB and samples with 50 or more in IMD\_PCR were defined as low-quality samples.

Then, we compared the number of segments of the samples, as well as the sample-to-sample correlation with other samples. In a batch of n samples, we compared one sample to the other samples (n-1) to obtain (n-1) correlation values for the 100<sup>th</sup>, 75<sup>th</sup>, 50<sup>th</sup>, 25<sup>th</sup> percentiles and the minimum, respectively. Each of these five sample-to-sample correlation values were compared with the number of segments in the sample, and the correlations between them were calculated. Finally, we selected the one with the highest correlation.

| Sample-to-sample correlation     | Correlation coefficient with the number of segments |         |
|----------------------------------|-----------------------------------------------------|---------|
|                                  | IMD_HYB                                             | IMD_PCR |
| The 100 <sup>th</sup> percentile | -0.9209                                             | -0.1646 |
| The 75 <sup>th</sup> percentile  | -0.9363                                             | -0.058  |
| The 50 <sup>th</sup> percentile  | -0.9173                                             | -0.0797 |
| The 25 <sup>th</sup> percentile  | -0.8324                                             | -0.0225 |
| The minimum                      | -0.1135                                             | -0.1936 |

IMD, inherited metabolism disorder; HYB, hybridization based capture approach; PCR, polymerase chain reaction based capture approach;

In the case of IMD\_PCR analysis, the association between the number of segments and the sample-to-sample correlation value was low. For the IMD\_HYB analysis, the 75<sup>th</sup> percentile value of the sample-to-sample correlation was -0.9363, which was most closely related to the number of segments.



Plot between the 75th percentile of sample-to-sample correlation and the number of segments in IMD\_HYB  
Correlation coefficient: -0.9363

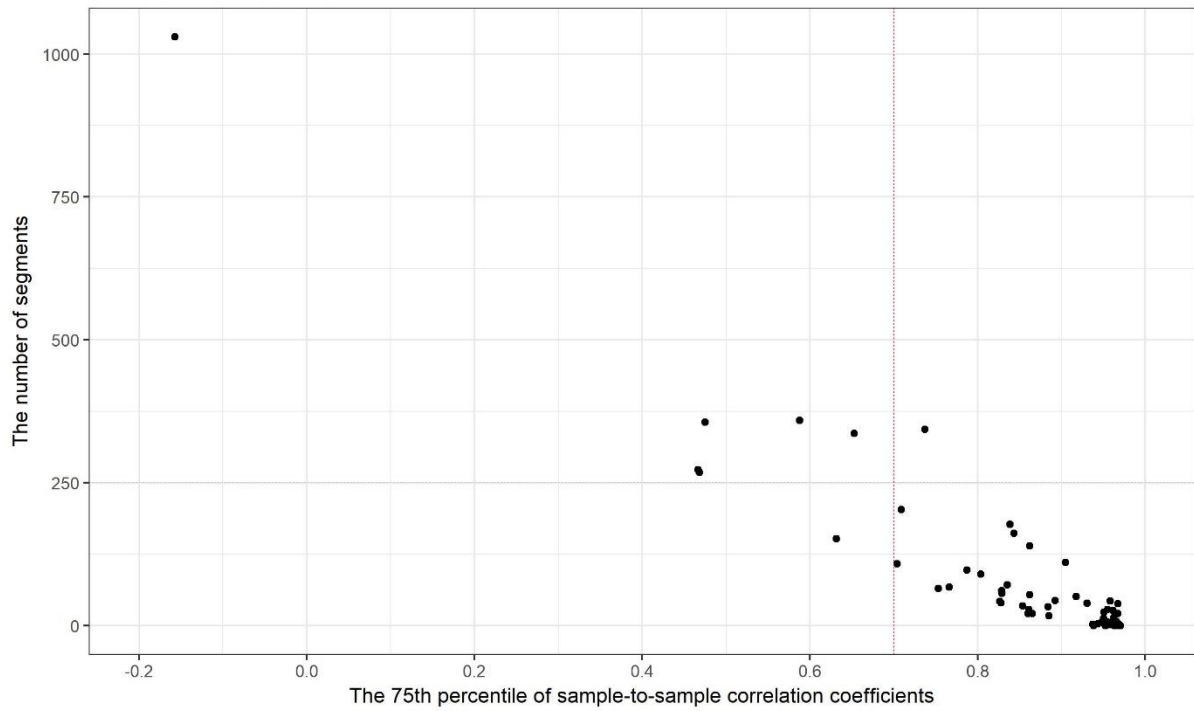

Plot between the 75th percentile of sample-to-sample correlation and the number of segments in IMD\_PCR  
Correlation coefficient: -0.058

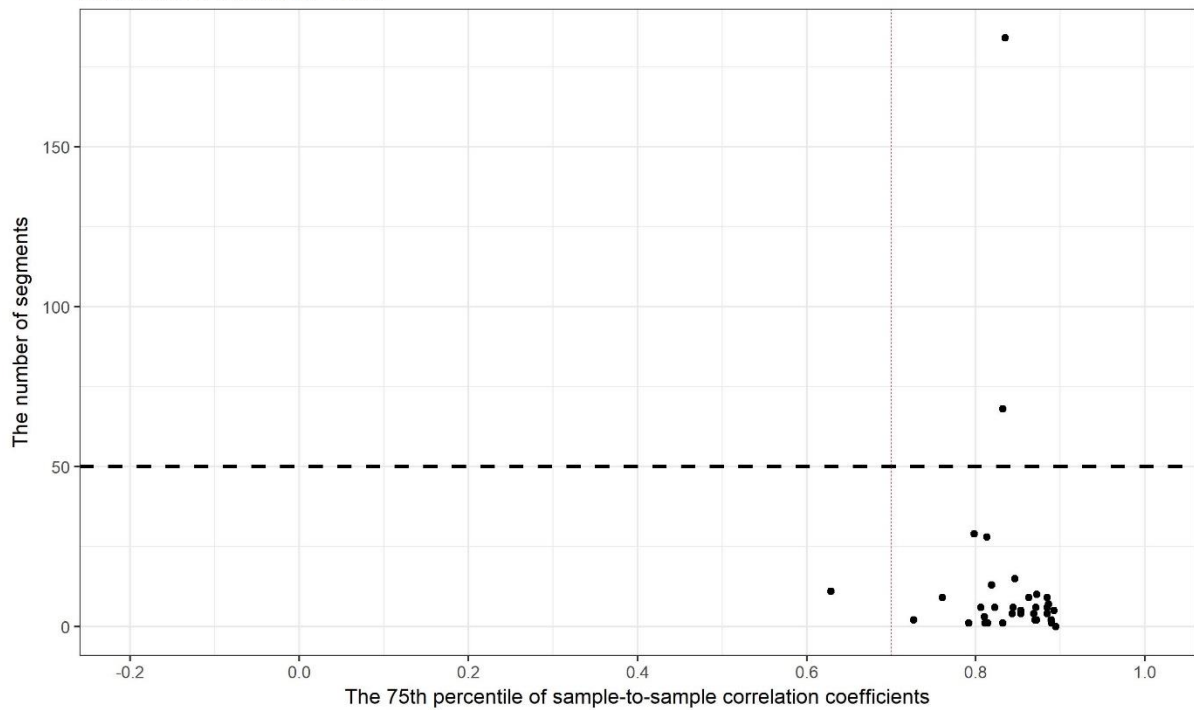

Finally, the 75th percentile sample-to-sample correlation value was considered to filter out the sample with a value less than 0.7.

**Note S11. Performance comparison based on duplication and deletion thresholds for read depth ratios**

When DeviCNV calculates p-values of probe-level CNVs and select raw CNV candidates, it needs duplication and deletion thresholds. We performed experiments with five duplication/deletion thresholds using IMD\_HYB and IMD\_PCR.

The following table shows statistics for raw CNV candidates before scoring. The stricter the duplication/deletion thresholds, the smaller the number of raw CNV candidates detected.

|          | TH.dup: 1.1 & TH.del: 0.9 |       |       | TH.dup: 1.2 & TH.del: 0.8 |       |       | TH.dup: 1.3& TH.del: 0.7 |      |       | TH.dup: 1.4& TH.del: 0.6 |     |       | TH.dup: 1.5& TH.del: 0.5 |     |       |
|----------|---------------------------|-------|-------|---------------------------|-------|-------|--------------------------|------|-------|--------------------------|-----|-------|--------------------------|-----|-------|
| #raw CNV | DUP                       | DEL   | TOTAL | DUP                       | DEL   | TOTAL | DUP                      | DEL  | TOTAL | DUP                      | DEL | TOTAL | DUP                      | DEL | TOTAL |
| Average  | 427.7                     | 410.8 | 838.5 | 153.6                     | 112.6 | 266.1 | 59.3                     | 25.9 | 85.2  | 24.7                     | 6.9 | 31.6  | 11.8                     | 2.4 | 14.2  |
| Median   | 444                       | 451   | 837   | 97                        | 55    | 150   | 14                       | 6    | 25    | 4                        | 2   | 7     | 1                        | 1   | 3     |

Average, an average of raw CNV candidates of all samples except low quality samples; Median, a median of raw CNV candidates of all samples except low quality samples; DEL, deletion; DUP, duplication; TOTAL, the total number of deletions and duplications.

The following table shows statistics for CNV candidates with confidence score of 5, which is the highest score from the scoring system of DeviCNV. DeviCNV extracts reliable CNV candidates through a scoring system. If the duplication/deletion thresholds are too low, it occurs a high probability that the pattern of data points in one CNV candidate is not stable, or the average read depth ratio value is not low(or high) enough. Therefore, it is understandable that 5-score CNV candidates are extracted less in the "TH.dup: 1.1 & TH, del: 0.9" experiment.

|         | TH.dup: 1.1 & TH.del: 0.9 |     |       | TH.dup: 1.2 & TH.del: 0.8 |     |       | TH.dup: 1.3& TH.del: 0.7 |     |       | TH.dup: 1.4& TH.del: 0.6 |     |       | TH.dup: 1.5& TH.del: 0.5 |     |       |
|---------|---------------------------|-----|-------|---------------------------|-----|-------|--------------------------|-----|-------|--------------------------|-----|-------|--------------------------|-----|-------|
| # CNV   | DUP                       | DEL | TOTAL | DUP                       | DEL | TOTAL | DUP                      | DEL | TOTAL | DUP                      | DEL | TOTAL | DUP                      | DEL | TOTAL |
| Average | 4.9                       | 1.5 | 6.4   | 5.6                       | 1.7 | 7.3   | 8.8                      | 2.4 | 11.2  | 10.9                     | 3.2 | 14.1  | 3.8                      | 1   | 4.8   |
| Median  | 1                         | 0   | 2     | 1                         | 0   | 2     | 1                        | 0   | 3     | 1                        | 1   | 3     | 1                        | 0   | 1     |

Average, an average of CNV candidates with the highest score of 5 of all samples except low quality samples; Median, a median of CNV candidates with the highest score of 5 of all samples except low quality samples; DEL, deletion; DUP, duplication; TOTAL, the total number of deletions and duplications.

Our cell-line and clinical data with known or confirmed CNVs were used to compare performance using various duplication/deletion thresholds. Results are shown in the table

below. When the duplication threshold was 1.3 and the deletion threshold was 0.7, all CNVs except two were found, and the performance was optimal. Therefore, we set these thresholds to 0.7 and 1.3, respectively, as default.

| Sample  |           |                                             | CNV            |           |                            |               | TH.dup: 1.1 & TH.del: 0.9 |                   | TH.dup: 1.2 & TH.del: 0.8 |      | TH.dup: 1.3 & TH.del: 0.7 |      | TH.dup: 1.4 & TH.del: 0.6 |      | TH.dup: 1.5 & TH.del: 0.5 |      |
|---------|-----------|---------------------------------------------|----------------|-----------|----------------------------|---------------|---------------------------|-------------------|---------------------------|------|---------------------------|------|---------------------------|------|---------------------------|------|
| Panel   | Cell line | Median read depth                           | Gene           | NM        | CNV                        | CNV size (kb) | Find? <sup>a</sup>        | #CNV <sup>b</sup> | Find?                     | #CNV | Find?                     | #CNV | Find?                     | #CNV | Find?                     | #CNV |
| IMD_HYB | GM14603   | 81.99                                       | <i>GAA</i>     | NM_000152 | EX18 DEL                   | 0.16          | O                         | 8                 | O                         | 15   | O                         | 24   | O                         | 27   | X                         | 8    |
|         | GM14734   | 249.4                                       | <i>CYP21A2</i> | NM_000500 | 30 KB DEL, Entire gene DEL | 3.35          | O                         | 2                 | A (EX1 copy-number error) | 3    | O                         | 2    | O                         | 2    | A (EX1-7)                 | 1    |
|         | GM24007   | 142.84                                      | <i>OTC</i>     | NM_000531 | Entire gene DEL            | 68.97         | O                         | 3                 | O                         | 3    | O                         | 7    | O                         | 10   | A (EX1-6,8-9)             | 6    |
|         | NA01741   | 164.4                                       | <i>GALT</i>    | NM_000155 | Entire gene DEL            | 4.01          | O                         | 2                 | O                         | 3    | O                         | 6    | O                         | 9    | O                         | 2    |
|         | NA06804   | 261.98                                      | <i>HPRT1</i>   | NM_000194 | EX2-3 DUP                  | 2.01          | O                         | 17                | O                         | 20   | O                         | 34   | O                         | 48   | O                         | 16   |
|         | NA06805   | 80.13                                       | <i>GALC</i>    | NM_000153 | EX11-17 DEL                | 17.73         | O                         | 12                | O                         | 21   | O                         | 44   | O                         | 62   | O                         | 11   |
|         | NA12217   | 269.08                                      | <i>CYP21A2</i> | NM_000500 | 30 KB DEL                  | 1.14          | X                         | 1                 | A (EX1)                   | 2    | X                         | 1    | X                         | 1    | X                         | 1    |
|         | NA22208   | 199.64                                      | <i>PCCA</i>    | NM_000282 | EX13-20 DEL                | 146.38        | A (larger region)         | 3                 | O                         | 3    | O                         | 3    | O                         | 3    | A (EX14, 18-20)           | 4    |
|         | Case_02   | 341.4                                       | <i>ASL</i>     | NM_000048 | EX15 DEL                   | 0.08          | O                         | 6                 | O                         | 7    | O                         | 7    | O                         | 6    | X                         | 4    |
|         | Case_03   | 276.8                                       | <i>GYS2</i>    | NM_021957 | EX6-11 DEL                 | 5.15          | O                         | 5                 | O                         | 5    | O                         | 5    | O                         | 7    | A (EX8)                   | 5    |
| IMD_PCR | NA01741   | Pool 1: 408.0, Pool 2: 556.0, Pool 3: 271.0 | <i>GALT</i>    | NM_000155 | Entire gene DEL            | 4.01          | O                         | 13                | O                         | 14   | O                         | 10   | O                         | 8    | O                         | 2    |
|         | NA12217   | Pool 1: 192.0, Pool 2: 117.0, Pool 3: 99.0  | <i>CYP21A2</i> | NM_000500 | 30 KB DEL                  | 1.14          | X                         | 46                | X                         | 55   | X                         | 37   | X                         | 15   | X                         | 4    |
|         | GM14603   | Pool 1: 215.0, Pool 2: 141.0, Pool 3: 90.0  | <i>GAA</i>     | NM_000152 | EX18 DEL                   | 0.16          | X                         | 23                | X                         | 29   | O                         | 25   | O                         | 18   | O                         | 11   |
|         | NA14734   | Pool 1: 359.0, Pool 2: 275.0, Pool 3: 335.0 | <i>CYP21A2</i> | NM_000500 | 30 KB DEL, Entire gene DEL | 3.35          | O                         | 10                | O                         | 12   | O                         | 9    | O                         | 5    | O                         | 3    |
|         | NA22208   | Pool 1: 235.0, Pool 2: 99.0, Pool 3: 158.0  | <i>PCCA</i>    | NM_000282 | EX13-20 DEL                | 146.38        | O                         | 11                | O                         | 19   | O                         | 27   | O                         | 11   | A (EX14, 17)              | 5    |
|         | GM24007   | Pool 1: 37.0, Pool 2: 20.0, Pool 3: 16.0    | <i>OTC</i>     | NM_000531 | Entire gene DEL            | 68.97         | X                         | 0                 | X                         | 0    | X                         | 1    | X                         | 0    | X                         | 2    |
|         | Case_04   | Pool 1: 174.0, Pool 2: 203.0, Pool 3: 185.0 | <i>ETFDH</i>   | NM_004453 | EX1-7 DEL                  | 23.51         | O                         | 19                | O                         | 29   | O                         | 26   | O                         | 15   | A (EX1-3, 5)              | 7    |
|         | Case_05   | Pool 1: 228.0, Pool 2: 330.0, Pool 3: 185.0 | <i>ETFDH</i>   | NM_004453 | EX7-8 DEL                  | 2.20          | X                         | 54                | X                         | 72   | O                         | 63   | X                         | 37   | X                         | 13   |

CNV, copy number variation; IMD, inherited metabolism disorder; HYB, hybridization based capture approach; PCR, polymerase chain reaction based capture approach; TH.dup, duplication threshold for read depth ratio; TH.del, deletion threshold for read depth ratio; EX, exon; DEL, deletion; DUP, duplication.

<sup>a</sup>Indicates whether each method found a known CNV. "O" means all CNVs were found, "X" means they were not found at all, and "A" means they were found only in some exons; <sup>b</sup>indicates the number of CNV candidates that received the highest score of 5 found in the corresponding sample.

## Note S12. Unique scoring system for selecting high-confidence CNV candidates

To achieve single exon resolution CNV detection, DeviCNV selects even small size CNVs, and that leads to many CNV candidates that need to be validated by the user. Moreover, if the input data are of low quality, many CNV candidates are detected because of the noise. Therefore, we have implemented a unique priority calculation system for raw CNV candidates in DeviCNV, to provide users with highly reliable CNV candidates. We selected five statistical results as measures of CNV confidence. The descriptions and calculation methods for the five measures are described below. After setting the optimal threshold for the above five measures, DeviCNV counts the number of measures that satisfy the criteria (the weights for all measures are 1). This allows candidates with high scores to be the highest priority candidates, thereby reducing the number of candidates the user must identify and verify. If all the measures are satisfied, the corresponding CNV candidate has a maximum value of five points.

(1) *ProbeCntInRegion*: how many signals support the CNV candidate

We count the number of probe-level read depth ratios for the CNV candidate. The larger this value is, the higher the reliability of the CNV candidate, because this indicates that many signals support that candidate. If the user only wants to get CNV candidates supported by more multiple probes, user can increase this value.

(2) *AverageOfReadDepthRatios*: how strong the signal supporting the CNV candidate

This value represents how far an average of the median read depth ratios supporting the CNV candidate is from the normal state (read depth ratio = 1). In the gene-centric plot, the red rectangle indicates the median read depth ratio, and the average of these values is *AverageOfReadDepthRatios*. The smaller this value is, the higher the reliability of detecting a deletion candidate. In contrast, the larger this value is, the higher the reliability of detecting a duplication candidate.

(3) *STDOfReadDepthRatios*: how stable the signals supporting the CNV candidate

It indicates whether the read depth ratios supporting the corresponding CNV candidates are constant. Thus, even if the median read depth ratios are far from 1(=neutral copy number) for a given CNV candidate, if the standard deviation of these values is large, this does not represent a stable signal. Therefore, the standard deviation of the median read depth ratios is obtained as *STDOfReadDepthRatios*. The closer this value is to zero, the more reliable the CNV candidate is.

(4) *AverageOfCIs*: how small the confidence intervals of the signals supporting the CNV candidate

In the gene-centric plot, the whisker of each red box (read depth ratio) represents the 95% confidence interval of the signal. The average of the confidence interval length of read depth ratios supporting the CNV candidate is *AverageOfCIs*. The closer this value is to zero, the greater the reliability of the CNV candidate.

(5) *AverageOfR2vals*: how reliable the model that generated the signals that support the CNV candidate

The R-squared values of the models indicate how the data fits the regression line. For example, the predicted read depth ratios from a model with a low R-squared value are not well predicted from the regression, and so they are more likely to represent noise and thus be less reliable. After calculating an average of the R-squared values of the total N models used to calculate one read depth ratio signal, an average of the average R-squared values for the signals supporting one CNV candidate is considered as *AverageOfR2vals*. The closer this value is to 1, the greater the reliability of the CNV candidate.

### **Note S13. Inherited metabolic disorder (IMD) panel description**

We have developed a custom gene panel for targeted DNA sequencing for clinical diagnosis and newborn screening covering inborn errors of metabolisms, and other diseases. The current version of the inherited metabolic disorder (IMD) panel is composed of 259 target genes and covers 498,034 bps of target regions, and there are two sub-panels for hybridization and polymerase chain reaction (PCR)-based capture approaches: IMD\_HYB and IMD\_PCR, respectively. The previous version of the IMD panel (IMD\_V1) contained 97 genes, covering 150,802 bps. This is the only version including a PCR-based approach.

### **Note S14. Generating targeted NGS data**

Targeted NGS data from cell lines and clinical samples were generated for validation and identification of known cell-line copy number variants (CNVs) and pathogenic CNVs.

To briefly describe the hybridization-based capture approach, sample DNA was sheared to around 150 bp, and barcoded adapters were ligated to allow the DNA fragments to be captured and sequenced. The fragments belonging to the target region were captured, purified, and sequenced using the 100 bp paired-end setting on a HiSeq instrument. Sequenced reads were aligned using the BWA version 0.7.12[2], and duplicates were marked and sorted using Picard 1.139 (<http://broadinstitute.github.io/picard/>). The reads were also realigned and recalibrated using the Genome Analysis Toolkit version 3.4.46 (GATK)[3, 4].

For the PCR-based capture approach, locus specific primers with barcoded adapters were designed to attach to a targeted region during PCR. Following PCR amplification, the amplified DNA fragments were pooled, purified, and sequenced on an Ion Torrent Personal Genome Machine (PGM) system or S5 (Thermo Fisher Scientific, Waltham, MA, USA). The data were processed for alignment with the standard Ion Torrent Suite™ Software on the Torrent Server.

#### **Note S15. Failure rate of DeviCNV, VisCap, XHMM, and CODEX**

The performance of DeviCNV was compared to VisCap, XHMM, and CODEX. The following table shows failure rates after sample QC for each tool.

In the case of VisCap, there is 'run\_1' which calls CNV using all samples. After that, 'run\_2', which calls CNV again, is repeated while removing samples with low quality. This process is performed until all remaining samples pass their own low-quality sample filter, and the number of runs per batch is different. The following table shows failure rates for 'run\_1', 'run\_2', and 'run\_last', the last run of the batch. For most batches in all panels of VisCap, the failure rates were high when 'run\_2'. Therefore, the result of 'run\_1' was used for comparison with DeviCNV.

| Tool    |       | Panels                    | IMD_HYB        |               | IMD_PCR        |               | IMD_V1         |
|---------|-------|---------------------------|----------------|---------------|----------------|---------------|----------------|
|         |       | Batches                   | 3              |               | 2              |               | Unknown        |
|         |       | Samples                   | 30 (cell line) | 36 (clinical) | 14 (cell line) | 20 (clinical) | 178 (clinical) |
|         |       | Average depth of coverage | 174X           | 345X          | 301X           | 349X          | 87X            |
| DeviCNV |       | Samples passing QC        | 24             | 35            | 14             | 19            | 172            |
|         |       | Failure rate              | 20%            | 3%            | 0%             | 5%            | 3%             |
| VisCap  | run_1 | Samples passing QC        | 30             | 36            | 14             | 20            | 178            |
|         |       | Failure rate              | 0%             | 0%            | 0%             | 0%            | 0%             |

|       |          |                    |        |       |      |      |       |
|-------|----------|--------------------|--------|-------|------|------|-------|
|       | run_2    | Samples passing QC | 1      | 15    | 0    | 0    | 174   |
|       |          | Failure rate       | 97%    | 58%   | 100% | 100% | 2%    |
|       | run_last | Samples passing QC | 0      | 13    | -    | -    | 30    |
|       |          | Failure rate       | 100%   | 56%   | -    | -    | 83%   |
| XHMM  |          | Samples passing QC | 25     | 35    | 10   | 17   | 166   |
|       |          | Failure rate       | 16.67% | 2.78% | 29%  | 15%  | 6.74% |
| CODEX |          | Samples passing QC | N/A    | N/A   | N/A  | N/A  | N/A   |
|       |          | Failure rate       | N/A    | N/A   | N/A  | N/A  | N/A   |

CNV, copy number variation; QC, quality control; IMD, inherited metabolism disorder; HYB, hybridization based capture approach; PCR, polymerase chain reaction based capture approach.

### Note S16. List of abbreviations

CNV: Copy number variant; NGS: Next generation sequencing; SNV: Single-nucleotide variant; INDEL: Short insertion and deletion; IMD: Inherited Metabolism Disorders; PCR: polymerase chain reaction; qPCR: Quantitative polymerase chain reaction; PGM: The Ion Torrent Personal Genome Machine; GATK: Genome Analysis Toolkit; QC: Quality control; BAM: Binary Alignment/Map; MQV: Mapping quality value; PCA: Principal component analysis; CBS: Circular binary segmentation; Bp: Base pairs; CN: Copy number; DUP: Duplication; DEL: Deletion; NEU: Neutral; CI: Confidence interval.

## References

1. Li H, Handsaker B, Wysoker A, Fennell T, Ruan J, Homer N, Marth G, Abecasis G, Durbin R, Genome Project Data Processing S: **The Sequence Alignment/Map format and SAMtools**. *Bioinformatics* 2009, **25**(16):2078-2079.
2. Li H: **Aligning sequence reads, clone sequences and assembly contigs with BWA-MEM**, vol. 1303; 2013.
3. DePristo MA, Banks E, Poplin R, Garimella KV, Maguire JR, Hartl C, Philippakis AA, del Angel G, Rivas MA, Hanna M *et al*: **A framework for variation discovery and genotyping using next-generation DNA sequencing data**. *Nature Genetics* 2011, **43**:491.
4. McKenna A, Hanna M, Banks E, Sivachenko A, Cibulskis K, Kernytsky A, Garimella K, Altshuler D, Gabriel S, Daly M *et al*: **The Genome Analysis Toolkit: A MapReduce framework for analyzing next-generation DNA sequencing data**. *Genome Research* 2010, **20**(9):1297-1303.
